# Supplementary material
Source: publisher figshare collection journal article supplement (https://acs.figshare.com/ndownloader/files/8252975)
Supplement: Supplementary file 1 [file 8252975]

## **Supporting Information**

### **3d-4f Heterometal-Organic Frameworks for Efficient Capture and Conversion of CO<sub>2</sub>**

*Wan-Zhen Qiao, Hang Xu, Peng Cheng, Bin Zhao\**

Department of Chemistry, Key Laboratory of Advanced Energy Material Chemistry  
(MOE), and Collaborative Innovation Center of Chemical Science and Engineering  
(Tianjin), Nankai University, Tianjin 300071, China

## Materials and Methods.

All the materials were commercially available and were used without further purification. Powder X-ray diffraction measurements were performed on a Ultima X-ray diffractometer equipped with Cu K $\alpha$  radiation. The C, H and N microanalyses were tested at the Institute of Elemental Organic Chemistry, Nankai University. Thermogravimetric analyses (TGA) were measured by a Netzsch TG 209 TG-DTA analyzer under a nitrogen atmosphere. <sup>1</sup>HNMR spectra were recorded on a Mercury Vx-300 spectrometer in CDCl<sub>3</sub> and CDCl<sub>3</sub> (7.26 ppm) was used as internal reference. ICP measurements were measured on a IRIS Advantage spectrometer.

## X-ray Crystallography

The X-ray single data of **1** and **2** was collected on a SuperNova Single Crystal Diffractometer equipped with MoK $\alpha$  radiation ( $\lambda = 0.71073 \text{ \AA}$ ) at low temperature.

The data integration and empirical absorption corrections were carried out by SAINT programs.<sup>1</sup> The structures were solved by direct methods and refined anisotropically on F<sup>2</sup> by the full matrix least-squares techniques with SHELXS-97 and SHELXL-97 programs.<sup>2</sup> All the hydrogen atoms were placed geometrically and refined using a riding model.

Because there are too many disordered solvent molecules in compound **1** and **2**, their diffraction contribution were removed by using PLATON/SQUEEZE,<sup>3</sup> and the guest molecules were determined by the TGA and elemental analysis. Detail crystal data and structure refinement for **1** (CCDC 1520461) and **2** (CCDC 1533607) are shown in Table S1.

**Table S1.** Crystal data and structure refinement for **1** and **2**.

| Identification code                                    | <b>1</b>                                                                    | <b>2</b>                                                                    |
|--------------------------------------------------------|-----------------------------------------------------------------------------|-----------------------------------------------------------------------------|
| Empirical formula                                      | TbZnC <sub>26</sub> H <sub>34.5</sub> N <sub>4.5</sub> O <sub>17.5</sub> Cl | TbCoC <sub>26</sub> H <sub>40.5</sub> N <sub>4.5</sub> O <sub>20.5</sub> Cl |
| Formula weight                                         | 949.5                                                                       | 996.5                                                                       |
| Temperature/K                                          | 125.15(10)                                                                  | 125.9(3)                                                                    |
| Crystal system                                         | monoclinic                                                                  | monoclinic                                                                  |
| Space group                                            | C2/c                                                                        | C2/c                                                                        |
| <i>a</i> /Å                                            | 27.9927(4)                                                                  | 28.0996(4)                                                                  |
| <i>b</i> /Å                                            | 13.9755(2)                                                                  | 13.8122(3)                                                                  |
| <i>c</i> /Å                                            | 22.6184(3)                                                                  | 22.4619(4)                                                                  |
| <i>α</i> /°                                            | 90                                                                          | 90                                                                          |
| <i>β</i> /°                                            | 99.5272(14)                                                                 | 99.3566(15)                                                                 |
| <i>γ</i> /°                                            | 90                                                                          | 90                                                                          |
| Volume/Å <sup>3</sup>                                  | 8726.6(2)                                                                   | 8601.8(3)                                                                   |
| <i>Z</i>                                               | 8                                                                           | 8                                                                           |
| <i>F</i> (000)                                         | 3200.0                                                                      | 3176.0                                                                      |
| Goodness-of-fit on <i>F</i> <sup>2</sup>               | 1.046                                                                       | 1.028                                                                       |
| Final <i>R</i> indexes<br>[ <i>I</i> ≥ 2σ( <i>I</i> )] | <i>R</i> <sub>I</sub> = 0.0204, <i>wR</i> <sub>2</sub> = 0.0481             | <i>R</i> <sub>I</sub> = 0.0267, <i>wR</i> <sub>2</sub> = 0.0638             |
| Final <i>R</i> indexes [all<br>data]                   | <i>R</i> <sub>I</sub> = 0.0239, <i>wR</i> <sub>2</sub> = 0.0495             | <i>R</i> <sub>I</sub> = 0.0331, <i>wR</i> <sub>2</sub> = 0.0660             |

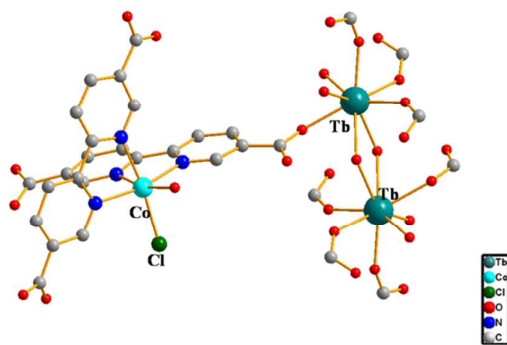

**Figure S1.** The coordinated environments of  $\text{Tb}^{3+}$ ,  $\text{Co}^{2+}$  and  $\text{BPDC}^{2-}$  ligand in compound **2**.

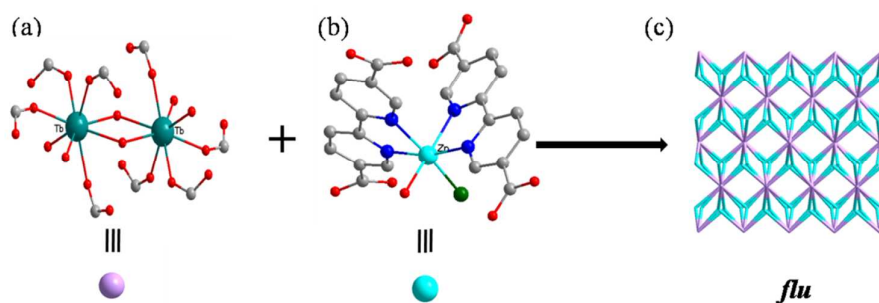

**Figure S2.** (a)  $[\text{Tb}_2]$  unit. (b)  $[\text{Zn}(\text{BPDC})_2]$  unit. (c) *Flu* topology of **1**: (purple)  $[\text{Tb}_2]$  unit, (blue)  $[\text{Zn}(\text{BPDC})_2]$  unit.

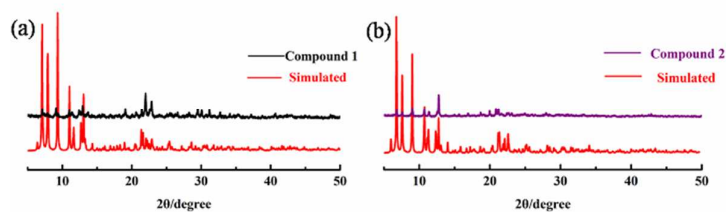

**Figure S3.** (a) Power XRD of simulated from single-crystal data of **1** (red) and compound **1** (dark) (b) Power XRD of simulated from single-crystal data of **2** (red) and compound **2** (purple).

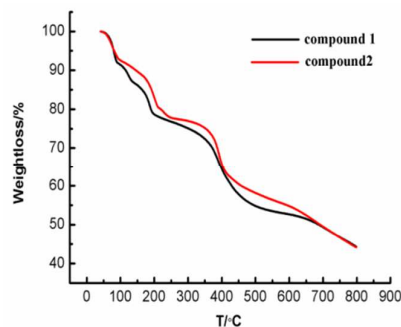

**Figure S4.** The TGA curves of compounds **1** (dark) and **2** (red).

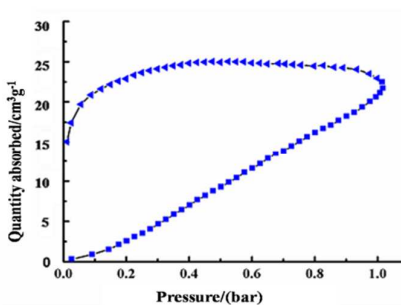

**Figure S5.** CO<sub>2</sub> isotherm of **1a** at 298 K.

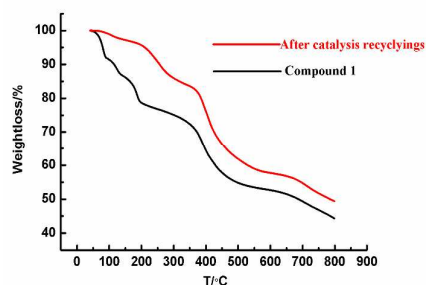

**Figure S6.** The TGA curves of compound **1** and after four recyclings.

## References

- 1 SAINT<sup>+</sup>, version 6.22; Bruker AXS: Madison **2001**.
- 2 Sheldrick, G. *Acta Crystallogr., Sect. A: Fundam. Crystallogr.* **2008**, *64*, 112-122.
- 3 Spek, A. L. *PLATON, A Multipurpose Crystallographic Tool*, Utrecht University, Utrecht, the Netherlands **2001**.
